# Supplementary material for: Lisdexamfetamine Dimesylate Effects on the Pharmacokinetics of Cytochrome P450 Substrates in Healthy Adults in an Open-Label, Randomized, Crossover Study
Source: PubMed Central journal article supplement — Drugs R D. 2015 Apr 11;15(2):175–85. doi: 10.1007/s40268-015-0090-z (PMC4488187; doi:10.1007/s40268-015-0090-z), 2015-04-11
Supplement: 40268_2015_90_MOESM1_ESM.pdf [file 40268_2015_90_MOESM1_ESM.pdf]

**Supplemental Table 1. Assay Performance Characteristics in Human Plasma**

|                     | Assay Range<br>(ng/mL) | Nominal Concentration |            |            |              |           |
|---------------------|------------------------|-----------------------|------------|------------|--------------|-----------|
|                     |                        |                       | Low QC     | Mid QC     | High QC      | ULOQ QC   |
|                     |                        |                       | 3 ng/mL    | 300 ng/mL  | 750 ng/mL    |           |
| Omeprazole          | 1–1000                 | % CV                  | 5.8        | 3.1        | 4.1          | ND        |
|                     |                        | % Bias                | 5.3        | 4.7        | –1.1         | ND        |
| 5-Hydroxyomeprazole |                        | % CV                  | 4.5        | 3.3        | 3.6          | ND        |
|                     |                        | % Bias                | –0.7       | 2.0        | –1.7         | ND        |
|                     |                        |                       | 0.3 ng/mL  | 18 ng/mL   | 78 ng/mL     |           |
| Midazolam           | 0.1–100                | % CV                  | 3.3        | 5.9        | 2.6          | ND        |
|                     |                        | % Bias                | –2.3       | –1.7       | –0.9         | ND        |
| 1-Hydroxymidazolam  |                        | % CV                  | 8.7        | 4.4        | 2.8          | ND        |
|                     |                        | % Bias                | –0.7       | –2.8       | –3.1         | ND        |
|                     |                        |                       | 0.15 ng/mL | 4 ng/mL    | 39 ng/mL     |           |
| Dextromethorphan    | 0.05–50                | % CV                  | 3.5        | 2.0        | 1.9          | ND        |
|                     |                        | % Bias                | –1.3       | –0.3       | 1.0          | ND        |
| Dextrorphan         |                        | % CV                  | 3.1        | 1.7        | 1.5          | ND        |
|                     |                        | % Bias                | 2.7        | 1.8        | 2.1          | ND        |
|                     |                        |                       | 60 ng/mL   | 7900 ng/mL | 15,800 ng/mL |           |
| Caffeine            | 20–20,000              | % CV                  | 7.8        | 2.1        | 2.6          | ND        |
|                     |                        | % Bias                | –0.3       | –2.3       | –2.5         | ND        |
| Paraxanthine        |                        | % CV                  | 4.3        | 3.7        | 2.9          | ND        |
|                     |                        | % Bias                | 1.5        | 0.5        | –0.6         | ND        |
|                     |                        |                       | 3 ng/mL    | 20 ng/mL   | 80 ng/mL     | 100 ng/mL |
| Lisdexamfetamine    | 1–100                  | % CV                  | 7.8        | 8.8        | 4.6          | 4.0       |
|                     |                        | % Bias                | –3.7       | –2.5       | –1.3         | –0.1      |
|                     |                        |                       | 6 ng/mL    | 40 ng/mL   | 160 ng/mL    | 200 ng/mL |
| d-Amphetamine       | 2–200                  | % CV                  | 5.1        | 7.8        | 5.3          | 3.4       |
|                     |                        | % Bias                | –7.2       | –3.5       | –0.6         | 0.5       |

CV=coefficient of variation; ND=not determined; QC=quality control; ULOQ=upper limit of quantification.

**Supplemental Table 2. Baseline Demographic Characteristics, Safety Analysis Set**

|                                                  | Cooperstown Cocktail Alone (Period 1)/<br>Cooperstown Cocktail+LDX 70 mg<br>(Period 2)<br>(n=15) | Cooperstown Cocktail+LDX 70 mg (Period<br>1)/ Cooperstown Cocktail Alone (Period 2)<br>(n=15) |
|--------------------------------------------------|--------------------------------------------------------------------------------------------------|-----------------------------------------------------------------------------------------------|
| Age, y                                           |                                                                                                  |                                                                                               |
| Mean $\pm$ SD                                    | 35.0 $\pm$ 8.32                                                                                  | 36.2 $\pm$ 7.71                                                                               |
| Range                                            | 21–45                                                                                            | 19–45                                                                                         |
| Sex, n (%)                                       |                                                                                                  |                                                                                               |
| Male                                             | 13 (86.7)                                                                                        | 5 (33.3)                                                                                      |
| Female                                           | 2 (13.3)                                                                                         | 10 (66.7)                                                                                     |
| Race, n (%)                                      |                                                                                                  |                                                                                               |
| White                                            | 13 (86.7)                                                                                        | 13 (86.7)                                                                                     |
| Black or African American                        | 2 (13.3)                                                                                         | 2 (13.3)                                                                                      |
| Ethnicity, n (%)                                 |                                                                                                  |                                                                                               |
| Hispanic or Latino                               | 9 (60.0)                                                                                         | 12 (80.0)                                                                                     |
| Not Hispanic or Latino                           | 6 (40.0)                                                                                         | 3 (20.0)                                                                                      |
| Mean $\pm$ SD weight, kg                         | 83.7 $\pm$ 11.72                                                                                 | 72.5 $\pm$ 15.10                                                                              |
| Mean $\pm$ SD height, cm                         | 175.3 $\pm$ 9.22                                                                                 | 167.8 $\pm$ 10.75                                                                             |
| Mean $\pm$ SD Body mass index, kg/m <sup>2</sup> | 27.2 $\pm$ 2.56                                                                                  | 25.5 $\pm$ 3.04                                                                               |

LDX=lisdexamfetamine dimesylate.

**Supplemental Table 3. Summary of TEAEs,<sup>a</sup> Safety Analysis Set**

|                                       | Cooperstown Cocktail<br>(n=30) |                  | Cooperstown Cocktail + LDX<br>(n=29) |                  |
|---------------------------------------|--------------------------------|------------------|--------------------------------------|------------------|
|                                       | n (%)                          | Number of Events | n (%)                                | Number of Events |
| Any TEAE                              | 18 (60.0)                      | 27               | 26 (89.7)                            | 77               |
| Any serious TEAE                      | 0                              | 0                | 0                                    | 0                |
| TEAE related to study drug            | 18 (60.0)                      | 27               | 26 (89.7)                            | 77               |
| TEAE leading to study discontinuation | 0                              | 0                | 0                                    | 0                |
| Any severe TEAE                       | 0                              | 0                | 0                                    | 0                |
| Preferred terms                       |                                |                  |                                      |                  |
| Insomnia                              | 2 (6.7)                        | 2                | 12 (41.4)                            | 12               |
| Somnolence                            | 13 (43.3)                      | 13               | 10 (34.5)                            | 10               |
| Dry mouth                             | 0                              | 0                | 9 (31.0)                             | 9                |
| Increased blood pressure              | 2 (6.7)                        | 2                | 8 (27.6)                             | 8                |
| Tachycardia                           | 0                              | 0                | 5 (17.2)                             | 5                |
| Dizziness                             | 4 (13.3)                       | 4                | 5 (17.2)                             | 5                |
| Decreased appetite                    | 0                              | 0                | 4 (13.8)                             | 4                |
| Euphoric mood                         | 0                              | 0                | 4 (13.8)                             | 4                |
| Nausea                                | 2 (6.7)                        | 2                | 3 (10.3)                             | 4                |
| Anxiety                               | 0                              | 0                | 3 (10.3)                             | 3                |
| Depressed mood                        | 0                              | 0                | 3 (10.3)                             | 3                |
| Abdominal pain                        | 0                              | 0                | 2 (6.9)                              | 2                |
| Headache                              | 2 (6.7)                        | 2                | 2 (6.9)                              | 2                |
| Peripheral coldness                   | 0                              | 0                | 2 (6.9)                              | 2                |

LDX=lisdexamfetamine dimesylate; TEAE=treatment-emergent adverse event.

<sup>a</sup>Participants were counted by the treatment most recently taken when the event occurred and were counted once per category per treatment.

**Supplemental Table 4. Mean  $\pm$  SD Change From Baseline in SBP, DBP, and Pulse Rate, Safety Analysis Set**

|                 | Cooperstown Cocktail Alone<br>(n=30) | Cooperstown Cocktail + LDX 70 mg<br>(n=29) |
|-----------------|--------------------------------------|--------------------------------------------|
| SBP, mmHg       |                                      |                                            |
| 4 h             | -0.7 $\pm$ 12.19                     | 8.2 $\pm$ 10.47                            |
| 8 h             | 2.6 $\pm$ 7.76                       | 16.9 $\pm$ 12.57                           |
| 12 h            | 1.5 $\pm$ 10.23                      | 13.5 $\pm$ 12.03                           |
| 24 h            | -1.4 $\pm$ 10.03                     | -1.3 $\pm$ 10.11                           |
| DBP, mmHg       |                                      |                                            |
| 4 h             | 1.3 $\pm$ 8.86                       | 6.1 $\pm$ 8.55                             |
| 8 h             | 1.8 $\pm$ 7.71                       | 10.6 $\pm$ 10.33                           |
| 12 h            | 0.9 $\pm$ 8.75                       | 7.6 $\pm$ 9.70                             |
| 24 h            | 3.0 $\pm$ 10.23                      | 2.9 $\pm$ 8.80                             |
| Pulse rate, bpm |                                      |                                            |
| 4 h             | -2.1 $\pm$ 11.09                     | 5.7 $\pm$ 10.45                            |
| 8 h             | 3.2 $\pm$ 10.04                      | 22.5 $\pm$ 15.89                           |
| 12 h            | 3.7 $\pm$ 8.37                       | 23.1 $\pm$ 14.63                           |
| 24 h            | 4.5 $\pm$ 10.89                      | 9.0 $\pm$ 12.18                            |

DBP=diastolic blood pressure; LDX=lisdexamfetamine dimesylate; SBP=systolic blood pressure.
